# Supplementary material
Source: PubMed Central journal article supplement (PMC4364232)
Supplement: pnas.201420024SI.pdf [file pnas.201420024SI.pdf]

# Supporting Information

Ma et al. 10.1073/pnas.1420024112

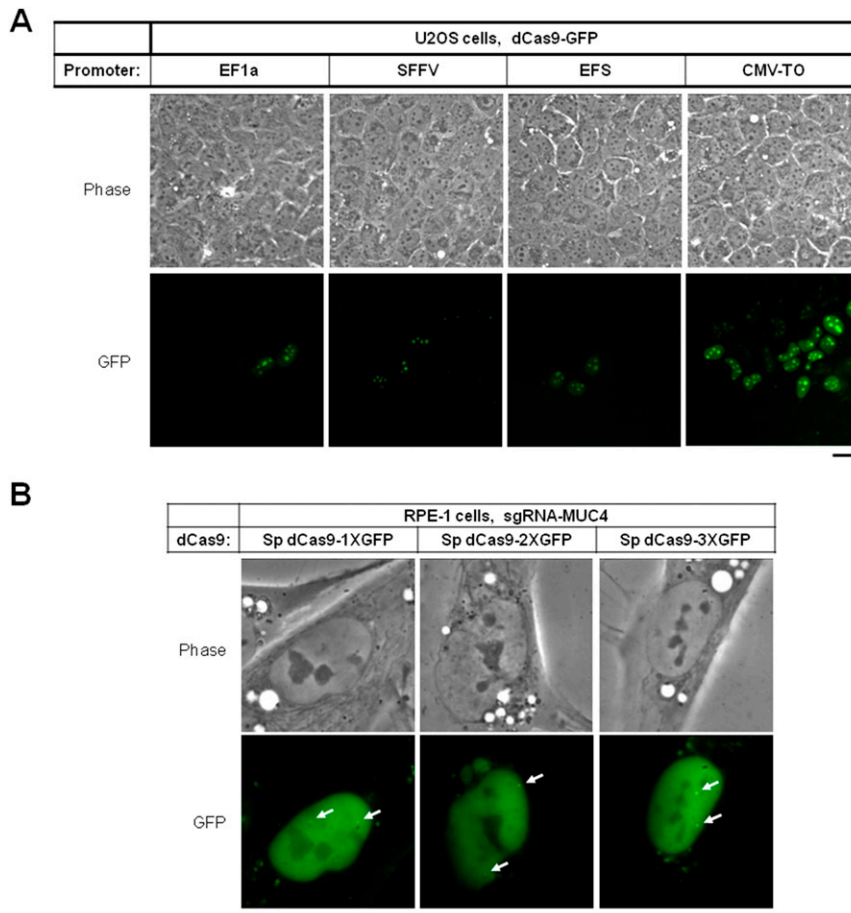

**Fig. S1.** Optimization of GFP-tagged Sp Cas9 expression. (A) Promoter optimization for CRISPR labeling using Sp Cas9-GFP. U2OS cells were transfected with 150 ng of dCas9-GFP expression plasmids under the control of a series of promoters: EF1 $\alpha$  (Left), SFFV (Middle Left), EFS (Middle Right), and CMV-TO (Right). Less than 5% of cells were GFP-positive when using the EF1 $\alpha$ , SFFV, and EFS promoters; however, the percentage of GFP-positive cells increased to 50% with use of the CMV-TO promoter. (Scale bar: 20  $\mu$ m.) (B) Increased labeling by fusing 3XGFP to Sp Cas9. RPE-1 cells were cotransfected with 250 ng of sgRNA plasmid targeting to the MUC4 gene locus and 50 ng of plasmids encoding Sp dCas9-1XGFP, Sp dCas9-2XGFP, or Sp dCas9-3XGFP. The fluorescent images in the bottom row were obtained within the same range of linear sensitivity and scaled to the same threshold. The brightness of foci (arrows) gradually increased when Sp dCas9 was tagged with 1XGFP, 2XGFP, or 3XGFP. (Scale bar: 5  $\mu$ m.)







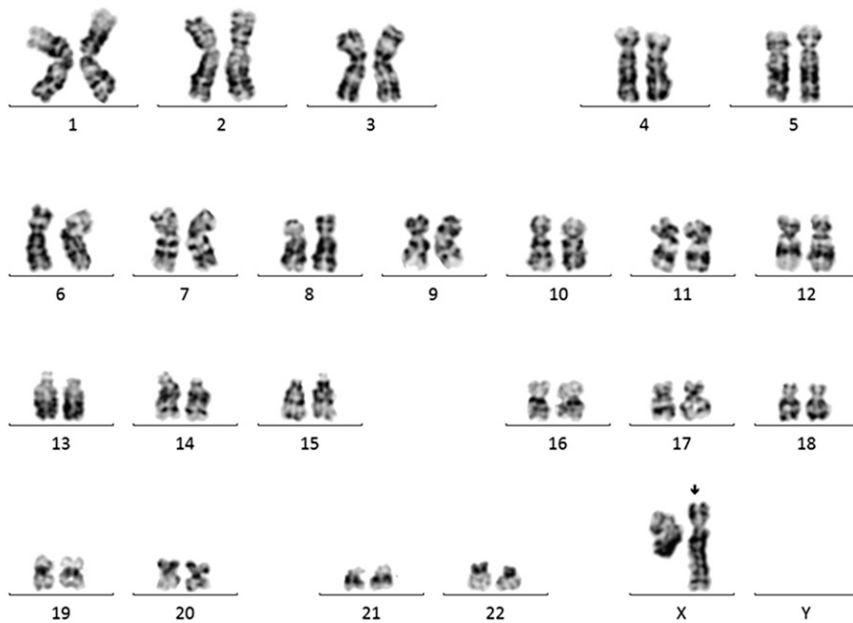

**Fig. 55.** Karyotype of RPE-1 cells. Chromosome analysis of RPE-1 cells (American Type Culture Collection CRL-4000) was performed. Twenty metaphase cells were analyzed, and all showed a near-diploid karyotype as shown, with a 2N chromosome number of 46. As shown in the image, one copy of the X carries an additional element at Xq28 (arrow).

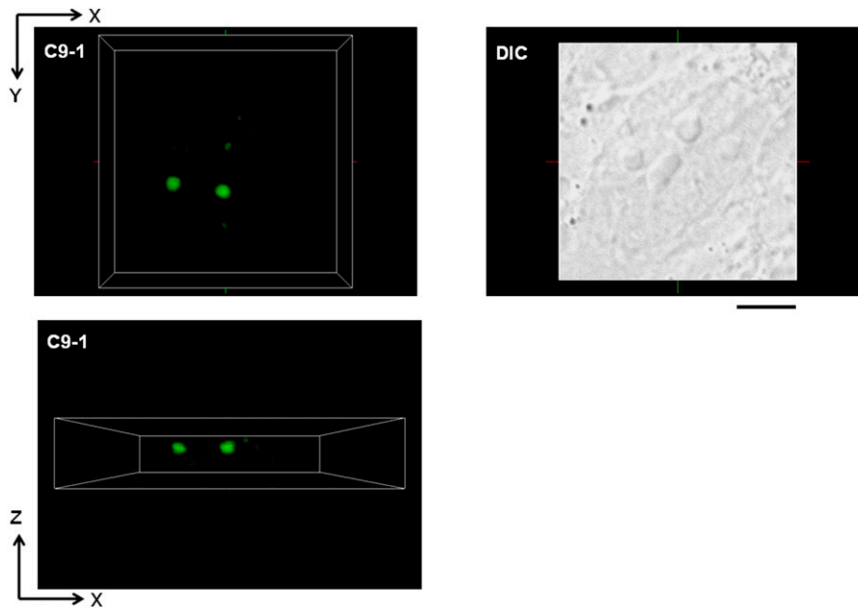

**Fig. 56.** Three-dimensional view of the chromosome 9 pericentromeric locus C9-1. U2OS cells were transfected with 150 ng of a plasmid encoding Sp dCas9-3XGFP and 750 ng of a plasmid encoding a SpsgRNA targeting to C9-1. Serial optical sections were then captured by confocal microscopy. The 3D images were reconstructed with Metamorph software. A representative example is shown in *x-y* (Upper Left) and *x-z* (Lower Left) projections. (Upper Right) The corresponding differential interference contrast (DIC) image. (Scale bar: 5  $\mu\text{m}$ .)

**Table S1. dCas9-FPs**

| Promoter     | dCas9 fusion protein              | NLS |
|--------------|-----------------------------------|-----|
| EF1 $\alpha$ | NLS-Sp dCas9-NLS-sfGFP            | 2X  |
| SSFV         | NLS-Sp dCas9-NLS-sfGFP            | 2X  |
| EFS          | NLS-Sp dCas9-NLS-sfGFP            | 2X  |
| CMV-TetO     | NLS-Sp dCas9-NLS-sfGFP            | 2X  |
| CMV-TetO     | NLS-Sp dCas9-NLS-2XsfGFP          | 2X  |
| CMV-TetO     | NLS-Sp dCas9-NLS-3XsfGFP          | 2X  |
| CMV-TetO     | NLS-Sp dCas9-NLS-3XmCherry        | 2X  |
| CMV-TetO     | NLS-Nm dCas9-NLS-3XsfGFP          | 2X  |
| CMV-TetO     | NLS-Nm dCas9-NLS-3XmCherry        | 2X  |
| CMV-TetO     | NLS-St1 dCas9-NLS-3XsfGFP         | 2X  |
| CMV-TetO     | NLS-St1 dCas9-2XNLS-3XsfGFP       | 3X  |
| CMV-TetO     | NLS-St1 dCas9-3XNLS-3XsfGFP       | 4X  |
| CMV-TetO     | NLS-St1 dCas9-3XNLS-3XTagBFP2     | 4X  |
| CMV-TetO     | NLS-St1 dCas9-3XNLS-3XsfGFP-NLS   | 5X  |
| CMV-TetO     | NLS-St1 dCas9-3XNLS-3XsfGFP-2XNLS | 6X  |

**Table S2. sgRNA vectors**

| Vector name      | sgRNA expression vector cassette        |
|------------------|-----------------------------------------|
| pLH-Sp sgRNA2    | U6 promoter-BbsI-CcdB-BbsI-Sp sgRNA2    |
| pLH-Nm sgRNAm3   | U6 promoter-BbsI-CcdB-BbsI-Nm sgRNAm3   |
| pLH-Nm sgRNA1.1  | U6 promoter-BbsI-CcdB-BbsI-Nm sgRNA1.1  |
| pLH-St1 sgRNAm1  | U6 promoter-BbsI-CcdB-BbsI-St1 sgRNAm1  |
| pLH-St1 sgRNAm7  | U6 promoter-BbsI-CcdB-BbsI-St1 sgRNAm7  |
| pLH-St1 sgRNA1.1 | U6 promoter-BbsI-CcdB-BbsI-St1 sgRNA1.1 |
| pLH-St1 sgRNA2.1 | U6 promoter-BbsI-CcdB-BbsI-St1 sgRNA2.1 |
| pLH-St1 sgRNA3.1 | U6 promoter-BbsI-CcdB-BbsI-St1 sgRNA3.1 |

**Table S3. Single-guide RNA sequences**

| dCas9                  | Target    | Guide RNA sequence       | PAM  |
|------------------------|-----------|--------------------------|------|
| <i>S. pyogenes</i>     | MUC4      | GTGGCGTGACCTGTGGATGCTG   | GG   |
| <i>S. pyogenes</i>     | Telo-TA   | GGTTAGGGTTAGGGTTAGGG     | TA   |
| <i>S. pyogenes</i>     | Telo-GT   | AGGGTTAGGGTTAGGGTTAG     | GT   |
| <i>S. pyogenes</i>     | Telo-AG   | GTTAGGGTTAGGGTTAGGGT     | AG   |
| <i>S. pyogenes</i>     | Sp-Telo   | TTAGGGTTAGGGTTAGGGTT     | GG   |
| <i>S. pyogenes</i>     | Telo-17   | GGGTTAGGGTTAGGGTT        | GG   |
| <i>S. pyogenes</i>     | Telo-13   | TAGGGTTAGGGTT            | GG   |
| <i>S. pyogenes</i>     | Telo-10   | GTTAGGGTT                | GG   |
| <i>S. pyogenes</i>     | Telo-06   | AGGGTT                   | GG   |
| <i>S. pyogenes</i>     | C9-1      | TGGAATGGAATGGAATGGAA     | GG   |
| <i>S. pyogenes</i>     | C9-2      | TGTCTGTGAGGAAGCTCCCC     | GG   |
| <i>S. pyogenes</i>     | C13-1     | TAAGCATGGACCATTCTTC      | GG   |
| <i>S. pyogenes</i>     | C13-2     | GGGCCAGGACCTCTAAAA       | GG   |
|                        |           | CCGGGGAAGTGCTGAGTC       | GG   |
|                        |           | TGGTGGGTGTAGACACGG       | GG   |
| <i>N. meningitidis</i> | Telo-AGGG | GGTTAGGGTTAGGGTTAGGGTTAG | AGGG |
| <i>N. meningitidis</i> | Telo-GGGT | GTTAGGGTTAGGGTTAGGGTTAGG | GGGT |
| <i>N. meningitidis</i> | Nm-Telo   | TTAGGGTTAGGGTTAGGGTTAGGG | GGTT |
| <i>N. meningitidis</i> | Telo-GTTA | TAGGGTTAGGGTTAGGGTTAGGGT | GTTA |
| <i>N. meningitidis</i> | C13-1     | CTCCATCCTGAAGGAATGGTCCAT | GCTT |
| <i>S. thermophilus</i> | St1-Telo  | GGTTAGGGTTAGGGTTAGGG     | AGGG |
| <i>S. thermophilus</i> | C9-1      | ATGGAATGGAATGGAATGGA     | GGAA |
